# Supplementary material
Source: publisher figshare collection journal article supplement (https://sage.figshare.com/ndownloader/files/24178597)
Supplement: Supplementary file 1 [file 24178597]

**Table 3a.**

Multiple linear regression with Self-esteem as dependent variable, and Eating disorders, Body Mass Index, body image and physical activity as predictors.

| Dimension          | Variables                  | Coefficient | Standard error | Coefficient $\beta$ | t     | p     | R    | R <sup>2</sup> | Durbin-Watson coefficient |
|--------------------|----------------------------|-------------|----------------|---------------------|-------|-------|------|----------------|---------------------------|
| Self-esteem        | Intercept                  | 10.65       | 0.36           | -                   | 29.67 | 0.000 |      |                |                           |
|                    | Eating-disordered behavior | 0.12        | 0.01           | 0.59                | 11.85 | 0.000 | 0.59 | 0.35           | 1.52                      |
| Excluded variables | Body Mass Index            | -           | -              | 0.02                | 0.66  | 0.51  | -    | -              | -                         |
|                    | Physical Activity          | -           | -              | 0.07                | 1.32  | 0.19  | -    | -              | -                         |
|                    | Body image                 | -           | -              | 0.03                | 0.46  | 0.65  | -    | -              | -                         |

Notes: \* =  $p \leq 0.05$ ; dependent variable = self-esteem.

**Table 3b.** Multiple linear regression with Body Mass Index as dependent variable, and body image, Eating disorders, physical activity and Self-esteem as predictors.

| Dimension          | Variables                  | Coefficient | Standard error | Coefficient $\beta$ | t      | p     | R    | R <sup>2</sup> | Durbin-Watson coefficient |
|--------------------|----------------------------|-------------|----------------|---------------------|--------|-------|------|----------------|---------------------------|
| Body Mass Index    | Intercept                  | 17.57       | 0.40           | -                   | 44.134 | 0.000 |      |                |                           |
|                    | Body image                 | 1.43        | 0.11           | 0.64                | 13.39  | 0.000 | 0.64 | 0.41           | 1.80                      |
| Excluded variables | Eating-disordered behavior | -           | -              | 0.03                | 0.67   | 0.50  | -    | -              | -                         |
|                    | Physical activity          | -           | -              | -0.03               | -0.59  | 0.56  | -    | -              | -                         |
|                    | Self-esteem                | -           | -              | 0.05                | 1.07   | 0.29  | -    | -              | -                         |

Notes: dependent variable = Body Mass Index.

**Table 3c.** Multiple linear regression with Eating disorders as dependent variable, and Self-esteem, physical activity, body image and Body Mass Index as predictors.

| Dimension                  | Variables         | Coefficient | Standard error | Coefficient $\beta$ | t     | p       | R    | R <sup>2</sup> | Durbin-Watson coefficient |
|----------------------------|-------------------|-------------|----------------|---------------------|-------|---------|------|----------------|---------------------------|
| Eating-disordered behavior | Intercept         | -10.42      | 3.55           | -                   | -2.94 | 0.004** |      |                |                           |
|                            | Self-esteem       | 2.84        | 0.24           | 0.59                | 11.85 | 0.000   | 0.59 | 0.35           | 0.52                      |
| Excluded variables         | Physical activity | -           | -              | 0.07                | 1.32  | 0.187   | -    | -              | -                         |
|                            | Body image        | -           | -              | 0.02                | 0.46  | 0.647   | -    | -              | -                         |
|                            | Body Mass Index   | -           | -              | 0.03                | 0.66  | 0.513   | -    | -              | -                         |

Notes: \*\* =  $p \leq 0.01$ ; dependent variable = eating disorders.

**Table 3d.** Multiple linear regression with Physical Activity as dependent variable, Self-esteem, Eating disorder, and Body image and as predictors.

| Dimension          | Variables                  | Coefficient | Standard error | Coefficient $\beta$ | t     | p     | R    | R <sup>2</sup> | Durbin-Watson coefficient |
|--------------------|----------------------------|-------------|----------------|---------------------|-------|-------|------|----------------|---------------------------|
| Physical Activity  | Intercept                  | 46.77       | 3.49           | -                   | 13.41 | 0.000 |      |                |                           |
|                    | Self-esteem                | 1.36        | 0.24           | 0.34                | 5.78  | 0.000 | 0.34 | 0.11           | 2.01                      |
| Excluded variables | Eating-disordered behavior | -           | -              | 0.10                | 1.324 | 0.187 | -    | -              | -                         |
|                    | Body image                 | -           | -              | -0.11               | -1.87 | 0.063 | -    | -              | -                         |
|                    | Body Mass Index            | -           | -              | -0.11               | -1.79 | 0.075 | -    | -              | -                         |

Notes: dependent variable = physical activity.

**Table 3e.** Multiple linear regression with Body image as dependent variable, Body Mass Index, Self-esteem, Eating disorder, and physical activity and as predictors.

| Dimension          | Variables                  | Coefficient | Standard error | Coefficient $\beta$ | t     | p     | R    | R <sup>2</sup> | Durbin-Watson coefficient |
|--------------------|----------------------------|-------------|----------------|---------------------|-------|-------|------|----------------|---------------------------|
| Body image         | Intercept                  | -3.06       | 0.48           | -                   | -6.38 | 0.000 |      |                |                           |
|                    | Body Mass Index            | 0.28        | 0.02           | 0.64                | 13.37 | 0.000 | 0.64 | 0.41           | 1.90                      |
| Excluded variables | Eating-disordered behavior | -           | -              | 0.03                | 0.67  | 0.285 | -    | -              | -                         |
|                    | Physical activity          | -           | -              | -0.03               | -0.59 | 0.504 | -    | -              | -                         |
|                    | Self-esteem                | -           | -              | -0.05               | 1.07  | 0.555 | -    | -              | -                         |

Note: dependent variable = body image.
